# Supplementary material
Source: PubMed Central journal article supplement (PMC5838789)
Supplement: jamainternmed-178-188-s001.pdf [file jamainternmed-178-188-s001.pdf]

## Supplementary Online Content

Cervantes L, Tuot D, Raghavan R, et al. Association of emergency-only vs standard hemodialysis with mortality and health care use among undocumented immigrants with end-stage renal disease. *JAMA Intern Med*. Published online December 18, 2017. doi:10.1001/jamainternmed.2017.7039

**eFigure.** Schoenfeld Residuals vs Follow-up Years, by Dialysis Care Group

**eTable 1.** Deaths and Approximate Hazard Ratios for Patients Treated With Emergency vs Standard Care Over 1, 3, and 5 Years of Follow-up Using Multivariate Adjusted

**eTable 2.** A Comparison of Mortality Outcomes Between the Final Study Sample and the Expanded Sample Over 1, 3, and 5 Years of Follow-up

**eTable 3.** A Comparison of Mortality Outcomes Between the Final Hispanic Study Sample and the Expanded Hispanic Sample Over 1, 3, and 5 Years of Follow-up

This supplementary material has been provided by the authors to give readers additional information about their work.

**eFigure.** Schoenfeld Residuals vs Follow-up Years, by Dialysis Care Group

1a. All patients

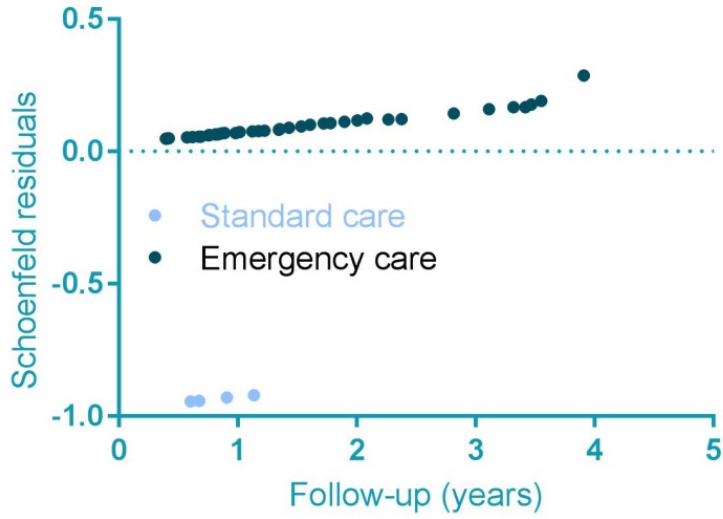

1b. Hispanic patients

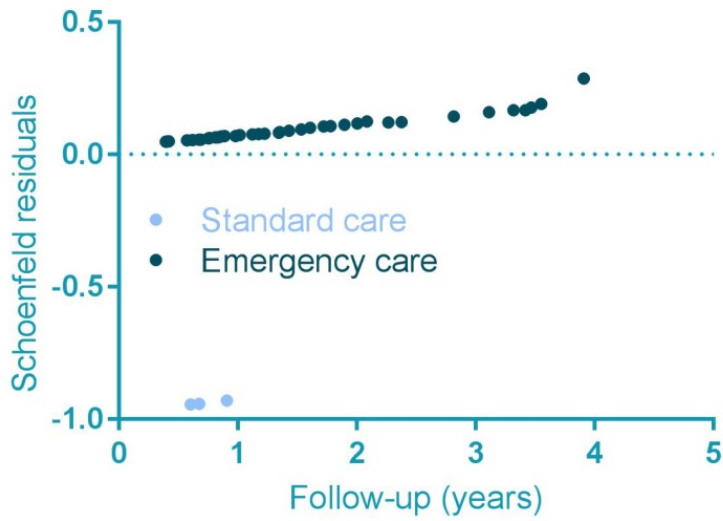

**eTable 1.** Deaths and Approximate Hazard Ratios for Patients Treated With Emergency vs Standard Care Over 1, 3, and 5 Years of Follow-up Using Multivariate Adjusted

| <b>Study Sample/Care group</b> | <b>Follow up period</b> | <b>No. of deaths</b> | <b>Patient-years</b> | <b>Multivariate adjusted hazard ratio* (95% CI)</b> |
|--------------------------------|-------------------------|----------------------|----------------------|-----------------------------------------------------|
| <b>All patients</b>            |                         |                      |                      |                                                     |
| Emergency care                 | 1 year                  | 15                   | 139.60               | 0.63<br>(0.13-2.97)                                 |
| Standard care                  |                         | 3                    | 39.24                | 1.00<br>(reference)                                 |
| Emergency care                 | 3 years                 | 32                   | 230.07               | 5.82<br>(1.18-28.64)                                |
| Standard care                  |                         | 4                    | 91.72                | 1.00<br>(reference)                                 |
| Emergency care                 | 5 years                 | 38                   | 246.82               | 16.43<br>(1.56-173.39)                              |
| Standard care                  |                         | 4                    | 115.57               | 1.00<br>(reference)                                 |
| <b>Hispanic patients</b>       |                         |                      |                      |                                                     |
| Emergency care                 | 1 year                  | 15                   | 133.88               | 0.63<br>(0.12-3.31)                                 |
| Standard care                  |                         | 3                    | 34.54                | 1.00<br>(reference)                                 |
| Emergency care                 | 3 years                 | 32                   | 220.44               | 8.57<br>(1.06-69.43)                                |
| Standard care                  |                         | 3                    | 80.89                | 1.00<br>(reference)                                 |
| Emergency care                 | 5 years                 | 38                   | 237.18               | 28.88<br>(1.28-652.02)                              |
| Standard care                  |                         | 3                    | 102.38               | 1.00<br>(reference)                                 |

\* Adjusted for propensity to undergo emergency versus standard hemodialysis score. Variables included in the propensity score include age, Charlson Comorbidity Index, history of diabetes, prior nephrology care, serum albumin, and smoking status.

**eTable 2.** A Comparison of Mortality Outcomes Between the Final Study Sample and the Expanded Sample Over 1, 3, and 5 Years of Follow-up

| Care group     | Follow-up period | Final study sample<br>(n= 211) |                        |                        | Expanded sample<br>(n= 252) |                        |                      |
|----------------|------------------|--------------------------------|------------------------|------------------------|-----------------------------|------------------------|----------------------|
|                |                  | No. of deaths                  | Unadj. HR<br>(95% CI)* | Adj. HR<br>(95% CI)*   | No. of deaths               | Unadj. HR<br>(95% CI)* | Adj. HR<br>(95% CI)* |
| Emergency care | 1                | 15                             | 0.94<br>(0.22-4.07)    | 0.52<br>(0.10-2.67)    | 18                          | 2.10<br>(0.61-7.16)    | 1.12<br>(0.28-4.54)  |
| Standard care  |                  | 3                              | 1.00<br>(reference)    | 1.00<br>(reference)    | 3                           | 1.00<br>(reference)    | 1.00<br>(reference)  |
| Emergency care | 3                | 32                             | 8.70<br>(1.89-40.09)   | 4.96<br>(0.93-26.45)   | 35                          | 7.12<br>(2.02-25.10)   | 3.85<br>(0.93-15.96) |
| Standard care  |                  | 4                              | 1.00<br>(reference)    | 1.00<br>(reference)    | 4                           | 1.00<br>(reference)    | 1.00<br>(reference)  |
| Emergency care | 5                | 38                             | 24.49<br>(2.37-252.80) | 14.13<br>(1.24-161.00) | 41                          | 12.58<br>(2.29-68.97)  | 6.85<br>(1.11-42.46) |
| Standard care  |                  | 4                              | 1.00<br>(reference)    | 1.00<br>(reference)    | 4                           | 1.00<br>(reference)    | 1.00<br>(reference)  |

\* Adjusted for propensity to undergo emergency versus standard hemodialysis score. Variables included in the propensity score include age, Charlson Comorbidity Index, history of diabetes, prior nephrology care, serum albumin, and smoking status.

**eTable 3.** A Comparison of Mortality Outcomes Between the Final Hispanic Study Sample and the Expanded Hispanic Sample Over 1, 3, and 5 Years of Follow-up

| Care group     | Follow-up period | Final Hispanic study sample<br>(n= 211) |                         |                        | Expanded Hispanic sample<br>(n= 235) |                        |                      |
|----------------|------------------|-----------------------------------------|-------------------------|------------------------|--------------------------------------|------------------------|----------------------|
|                |                  | No. of deaths                           | Unadj. HR (95% CI)*     | Adj. HR (95% CI)*      | No. of deaths                        | Unadj. HR (95% CI)*    | Adj. HR (95% CI)*    |
| Emergency care | 1                | 15                                      | 1.01<br>(0.21-4.85)     | 0.51<br>(0.09-2.89)    | 18                                   | 2.43<br>(0.64-9.19)    | 1.19<br>(0.27-5.35)  |
| Standard care  |                  | 3                                       | 1.00<br>(reference)     | 1.00<br>(reference)    | 3                                    | 1.00<br>(reference)    | 1.00<br>(reference)  |
| Emergency care | 3                | 32                                      | 14.12<br>(1.80-110.90)  | 7.34<br>(0.83-64.76)   | 35                                   | 9.73<br>(2.09-45.40)   | 4.83<br>(0.90-25.99) |
| Standard care  |                  | 3                                       | 1.00<br>(reference)     | 1.00<br>(reference)    | 3                                    | 1.00<br>(reference)    | 1.00<br>(reference)  |
| Emergency care | 5                | 38                                      | 48.19<br>(2.09-1110.30) | 25.40<br>(1.03-629.20) | 41                                   | 18.56<br>(2.32-148.40) | 9.26<br>(1.05-82.04) |
| Standard care  |                  | 3                                       | 1.00<br>(reference)     | 1.00<br>(reference)    | 3                                    | 1.00<br>(reference)    | 1.00<br>(reference)  |

\* Adjusted for propensity to undergo emergency versus standard hemodialysis score. Variables included in the propensity score include age, Charlson Comorbidity Index, history of diabetes, prior nephrology care, serum albumin, and smoking status.
